# Supplementary material for: Presence of Breeding Birds Improves Body Condition for a Crocodilian Nest Protector
Source: PubMed Central journal article supplement (PMC4775066; doi:10.1371/journal.pone.0149572), 2016-03-02

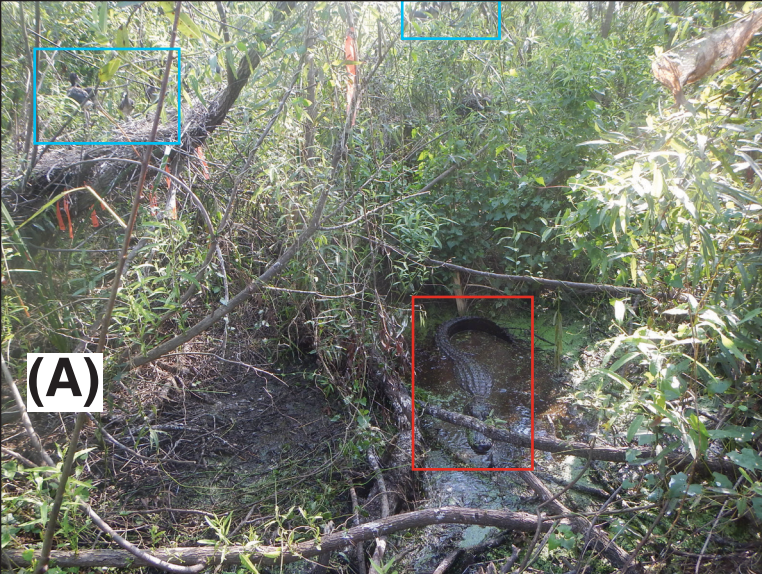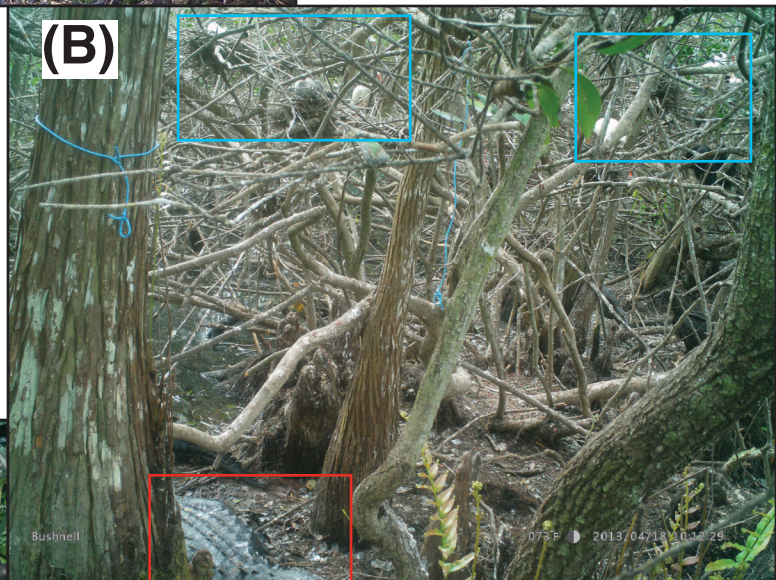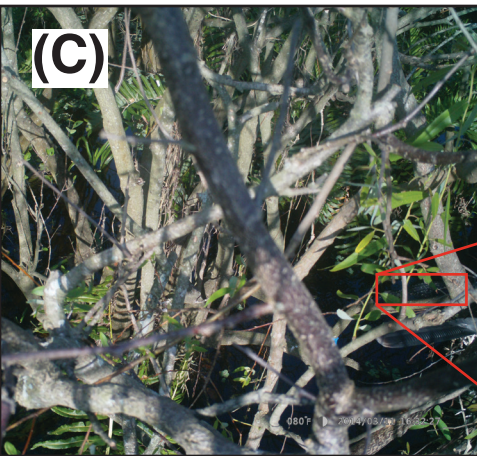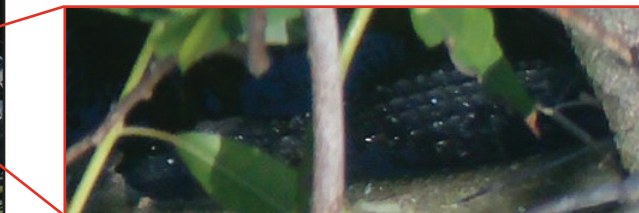

Supplement: pone.0149572.s001.pdf [file pone.0149572.s001.pdf]
