# Supplementary material for: Presence of Breeding Birds Improves Body Condition for a Crocodilian Nest Protector
Source: PubMed Central journal article supplement (PMC4775066; doi:10.1371/journal.pone.0149572), 2016-03-02
Supplement: pone.0149572.s003.pdf [file pone.0149572.s003.pdf]

| Rank <sup>§</sup> | Model                                                       | $AIC_c$ | $\Delta_i$ | $w_i$ | $k$ |
|-------------------|-------------------------------------------------------------|---------|------------|-------|-----|
| 1 (1)             | Colony presence + Water depth range + Alligator holes       | 890.26  | 0.00       | 0.55  | 5   |
| 2 (2)             | Colony presence                                             | 891.86  | 1.59       | 0.25  | 3   |
| 3 (3)             | Colony presence + Water depth range                         | 894.35  | 4.09       | 0.07  | 4   |
| 4 (4)             | Colony presence + Tree island area                          | 894.45  | 4.19       | 0.07  | 4   |
| 5 (5)             | Colony presence $\times$ Minimum water depth <sup>†</sup>   | 895.34  | 5.08       | 0.04  | 7   |
| 6 (7)             | Tree island area                                            | 899.25  | 8.99       | 0.01  | 3   |
| 7 (6)             | Water depth range                                           | 899.35  | 9.09       | 0.01  | 3   |
| 8 (9)             | Minimum water depth <sup>†</sup>                            | 900.76  | 10.49      | 0.00  | 4   |
| 9 (8)             | Minimum water depth <sup>†</sup> $\times$ Water depth range | 901.56  | 11.30      | 0.00  | 7   |
| 10 (10)           | Minimum water depth <sup>†</sup> $\times$ Tree island area  | 904.37  | 14.11      | 0.00  | 7   |
| 11 (11)           | Minimum water depth <sup>†</sup> $\times$ Alligator holes   | 906.69  | 16.43      | 0.00  | 7   |

§ Ranks in parentheses signify their position in model selection for Fulton's factor,  $K$

† Quadratic term included
