# Supplementary material for: Presence of Breeding Birds Improves Body Condition for a Crocodilian Nest Protector
Source: PLoS One. 2016 Mar 2;11(3):e0149572. doi: 10.1371/journal.pone.0149572 (PMC4775066; doi:10.1371/journal.pone.0149572)
Supplement: S4 Table — (XLSX) [file pone.0149572.s005.xlsx]

## Sheet: data
sv	mass	sex
69.3	6.6	F
49.8	2.4	F
44.8	2	F
62.4	4.4	F
64.2	5.4	F
105.1	24	F
50	2.7	F
66.5	6.1	F
77.9	10.4	F
116.4	36	F
61.4	4	F
107.1	25	F
92.2	16	F
55	3.1	F
50.3	2.2	F
107.9	25	F
102	23.5	F
72.1	8.4	F
119.5	40.6	F
52.3	2.7	F
65	5.5	F
72.5	3.7	F
79.7	10.2	F
54	2.8	F
70.2	7.5	F
76.9	10	F
70.6	7.3	F
63.5	5.5	F
65	5.2	F
94	16.2	F
109.2	27.5	F
87.7	14.2	F
61.5	5	F
53.1	2.7	F
73.2	7.8	F
85.7	12.6	F
50.4	2.2	F
112.5	34	F
107.5	27	F
96.5	22.5	F
75.1	8.2	F
100.8	23.5	F
70	6.25	F
66	5	F
100	22	F
83	13	F
74	10	F
88	17	F
68.5	6	F
58.6	4.2	F
85.2	12.25	F
82.5	12.5	F
102.3	25	F
103.5	24	F
57.5	4.2	F
59	5	F
101.8	18	F
65.5	5.6	F
98.5	18	F
76.4	9.3	F
64.3	5.5	F
112.5	29	F
105	30	F
109.5	28	F
80	11.6	F
97.7	22	F
67.1	5.25	F
105.5	26	F
117	38	F
114.4	38	F
105	30	F
77.3	10	F
64.4	4.5	F
102.5	26	F
102.2	26	F
104.9	25.5	F
104.5	27	F
109	28.5	F
110	30.5	F
71.6	8.3	F
92.8	16.5	F
76.5	10.3	F
99.5	26	F
66.2	5.6	F
57.5	4.2	F
106.2	31	F
57.5	3.6	F
80	10	F
109	25.5	F
60.2	4.9	F
101.6	24	F
69.4	7.2	F
112	31	F
93.1	20.5	F
55.4	4	F
104.5	31	F
65.3	5.4	F
73	7.4	F
74.5	8.2	F
66.5	5.2	F
107	31	F
59.5	3.9	F
81	13.5	F
105	25.1	F
102	25.1	F
96	19.5	F
98.1	23.5	F
98.5	21.5	F
60	4.8	F
94.6	18.5	F
85.5	13.5	F
102.6	23.5	F
96.6	21	F
108	27.5	F
44.2	1.48	F
41.3	1.12	F
63.6	4	F
86.2	19.2	F
96.2	20	F
63.7	5	F
94.3	18.5	F
67.7	5.5	F
35	0.82	F
85.2	13.5	F
69	6.8	F
63	4.9	F
87.7	15	F
44.3	1.8	F
99	22.5	F
97.3	23.5	F
49.5	2.2	F
111.5	30	F
55.6	3.1	F
56.6	3.6	F
59.6	4.2	F
40.8	1.25	F
46.7	1.8	F
51.1	2.75	F
125	51	F
81	10	F
55.3	2.8	F
46.5	2.1	F
63.2	4.75	F
105	22	F
119	34	F
111.6	34	F
93.8	17.4	F
106.8	28.5	F
50.6	2.6	F
49	2.325	F
93.5	18.5	F
38	0.975	F
72.5	8.4	F
54.6	3.4	F
107.3	25.25	F
103	26.5	F
101.5	22	F
97.6	21	F
101.8	25.5	F
99.8	22.5	F
51.5	2.8	F
64.5	5.2	F
65.7	6.4	F
49.8	2.6	F
47.3	2.5	F
109.4	33	F
110.3	25.9	F
109.6	31	F
44.2	1.7	F
64.1	5.5	F
38.5	1.8	F
53.1	3.25	F
57.4	4.7	F
54.3	3.5	F
43.6	1.5	F
53.8	3.4	F
84.8	13.25	F
104.1	23.5	F
110.8	30	F
63.6	6.1	F
83	11	F
40	1.31	F
106.5	31	F
42.6	1.5	F
56.8	4.3	F
65.5	5.7	F
44	1.7	F
53.6	2.4	F
93.1	20	F
47.3	2.1	F
92.5	17.5	F
97.6	23.5	F
83.2	13	F
63.3	5.9	F
72	7.1	F
105.7	25.5	F
110.8	30.5	F
98.8	23.5	F
75	7.9	F
109.1	30	F
98	21	F
53.1	2.8	F
70.4	8.1	F
99.7	28.5	F
83	12	F
60.3	4.6	F
100.2	20	F
56.4	3.5	F
43.9	1.75	F
87.9	13.25	F
107.8	25.25	F
111.9	35	F
97.1	24.5	F
62.8	4.6	F
50.9	2.6	F
63.5	5.4	F
45.7	2.2	F
78.3	10.5	F
63.4	5.4	F
62.9	4.7	F
96.5	22.5	F
107.9	36	F
97.9	21	F
110.1	32.5	F
94.5	20.5	F
68.1	6.7	F
42.5	2	F
85	14.5	F
104.5	23	F
55.5	3.4	F
58.2	4.3	F
80.9	10.8	F
87.5	17.2	F
70.8	7.2	F
97.3	24	F
89.1	16.4	F
89.6	14.4	F
107.4	28	F
78.3	9.6	F
105.1	18	F
98.8	20	F
81.1	11	F
104.9	27	F
95.1	18.8	F
105.9	27	F
118	39.5	F
106.5	28	F
101.6	24	F
107.9	32.5	F
58.7	3.7	F
47.5	2	F
61.3	4	F
90.5	15.4	F
112.3	28	F
95.5	18.2	F
48.4	2.1	F
50.3	2.5	F
86.8	13.4	F
89.9	16.8	F
85.4	13.4	F
78.8	11.2	F
64.4	4.6	F
63.2	5.4	F
102.7	24.5	F
110	33	F
90	15.5	F
76	9.4	F
95	20.5	F
81.8	11.2	F
78	9.6	F
112.2	34.5	F
94.4	19	F
88.3	15.8	F
61.8	4.75	F
98.6	22	F
96.3	19	F
98	24	F
70.2	8.4	F
102.5	25.1	F
104.1	29	F
77.3	11.9	F
109.2	36	F
92.3	17.5	F
58.6	3.7	F
96.8	21.1	F
99.4	19.7	F
55.8	3.5	F
73.9	6.7	F
116.3	35.2	F
107.8	29.9	F
97.5	10.5	F
89.3	14.6	F
101	22.5	F
73.3	8.2	F
56.9	3.4	F
59.7	4	F
114.1	34.5	F
68.1	7.5	F
70.6	6.4	F
73	8.4	F
108.3	34	F
65	6.1	F
52.7	3.6	F
76.1	9	F
97.6	19.4	F
114.8	35.5	F
65.2	5	F
104.9	22.5	F
72.4	8.4	F
80	11.6	F
94.1	19.5	F
88.2	16	F
46.4	2.05	F
76.8	10.9	F
79	10.2	F
113.3	36	F
74.4	8.2	F
115.9	40.5	F
122.5	48	F
85.8	13.4	F
80.4	12.2	F
63	5	F
92.6	20.5	F
109.3	32.5	F
105.9	27.5	F
105.8	26	F
90.1	17	F
102.6	27	F
91.8	16.5	F
116.5	32.5	F
76.6	9	F
106.2	33.5	F
104.2	24	F
68.2	6.2	F
92.8	16.3	F
97.2	20.5	F
78	11	F
102.2	23.5	F
93.8	17.5	F
89.7	13.4	F
85	13.8	F
98.2	23.5	F
63.2	5.6	F
63	4.5	F
63.8	5	F
47.4	2	F
40.9	1.4	F
120.9	45	F
103.2	21.5	F
101.5	21	F
102.5	28.5	F
110.1	29	F
96	16.4	F
111.6	34.5	F
107	29	F
96.2	19	F
96.1	19.4	F
112.7	31	F
63.7	6	F
111	34.5	F
89.9	15.4	F
98	19.2	F
83.2	11.8	F
117.6	35	F
94.9	20	F
97.9	20	F
69.4	6.2	F
119.6	50.5	F
101	21	F
99.6	22	F
106.9	26	F
108.4	27.5	F
102.7	25	F
90.5	16	F
119.1	40.5	F
113.8	28.5	F
82.1	12	F
92	17.4	F
95	18.6	F
59.4	4.2	F
62	4.2	F
86.4	14	F
80.1	10.4	F
105.2	25	F
83.1	13.2	F
84	12.4	F
70.3	6.8	F
75.4	8.6	F
103.7	21	F
85.5	15	F
67.5	6	F
87.2	14.25	F
83.3	12.2	F
59.8	4.1	F
111.8	28.5	F
88.4	14.6	F
90.3	16.9	F
108.7	37	F
60.3	4.8	F
71.6	7.4	F
61.7	4.25	F
52.5	3.2	F
47.5	2.1	F
61.5	3.7	F
113	14.4	F
55.5	3.8	F
85	14	F
111.9	34	F
56.8	3.4	F
80.3	9.8	F
110	31	F
101.9	28	F
112.5	35	F
99.3	23	F
108.8	29	F
83	12.2	F
108.5	28.5	F
104.9	26	F
104.7	27.5	F
118.5	48	F
72.9	7.6	F
98.5	24	F
85.5	14.5	F
103.8	18.5	F
83.5	12.2	F
87.4	15	F
104.1	22	F
61.2	4.1	F
113.7	31	F
85.8	13.5	F
92.2	17	F
91.6	18	F
51.6	2.8	F
97.5	21	F
97	19	F
77	9.4	F
77.7	9.2	F
88.9	15.2	F
72.8	9.2	F
93.2	23	F
105.9	31	F
77.2	9.4	F
117	35.3	F
92.3	17	F
75.5	8	F
114.9	35.5	F
109.8	30.5	F
64.9	5.4	F
80.6	11.4	F
103.3	23	F
110.8	31	F
90.8	16	F
94.4	21	F
100.5	27	F
90	16.2	F
101.5	24.5	F
110.9	32	F
108.5	31	F
131.6	48	F
52.8	2.9	F
67.6	6.1	F
108.1	29	F
109.5	33	F
81.2	12	F
70.2	7	F
52	3.1	F
91.2	15	F
70	6.4	F
46.7	1.95	F
97.5	20.5	F
94.8	15.2	F
102.8	25.5	F
60.8	4.4	F
104.4	27	F
85.4	12.5	F
98.8	23.5	F
96	21	F
115.3	31.5	F
111.6	31	F
46.6	1.9	F
49.9	2.5	F
90.1	15	F
92.6	19	F
52	2.75	F
113	32.5	F
93.2	16.8	F
68.3	6.6	F
94.2	15.8	F
55.8	3.25	F
73.8	9.8	F
122.8	43	F
112.9	33	F
100.9	21	F
106.7	26	F
90.5	15	F
89.2	15.4	F
85.5	14.4	F
108.3	28	F
53.5	2.8	F
90	15.2	F
81	10.6	F
89.5	13.8	F
89.9	16.4	F
101	16.5	F
113.9	30	F
135.9	48	F
67	6.2	F
75.8	7.6	F
53.9	2.9	F
81.7	11.4	F
65.4	5.6	F
80.5	11.2	F
128	41	F
99.2	21.5	F
121.1	56	F
108.3	31	F
79	10.6	F
111	35	F
100.3	22	F
88.2	14.5	F
56.9	3.75	F
68.3	6.25	F
107.8	28	F
111.5	31	F
102.8	19.75	F
82.2	14	F
75.1	8.8	F
78.1	9.5	F
83.6	11	F
94	15.6	F
90.6	15.2	F
87.1	13.2	F
75.7	8.4	F
79	12	F
92.4	15.2	F
108.5	27	F
81.6	12	F
118.5	34.5	F
66	5.4	F
64.9	4.55	F
111.8	31.5	F
97.9	18	F
111.9	30	F
107.5	26	F
104.2	22.5	F
110.6	27.5	F
67.5	7	F
111	32	F
88	13.2	F
113.5	33	F
111	26	F
100.1	18.5	F
110.2	32	F
110.1	21.5	F
100.5	13.2	F
97.9	12.4	F
103	24.5	F
89.2	14.5	F
60.1	4.2	F
88.4	16.5	F
80.6	11.5	F
97.5	19	F
98	19	F
106.7	21	F
98.6	20.5	F
